# Supplementary material for: Inhibition and interactions of alpha-amylase by daucosterol from the peel of Chinese water chestnut (Eleocharis dulcis)
Source: Royal Society of Chemistry journal article supplement (doi:10.1039/d1fo00887k), 2021-01-01
Supplement: d1fo00887k1.pdf [file d1fo00887k1.pdf]

## Supplementary material

### Contents

#### 1. Supplementary Figure

Fig. S1. Inhibitory effect of stigmasterol glucoside (A), campesterol glucoside (B), daucosterol (C) and acarbose (D) on alpha-amylase.

Fig. S2. Sequence alignment of the amino acid residue between alpha-amylase (GenBank: NP\_999360.1) and 3L2M\_A from pig pancreatic.

Fig. S3.  $^1\text{H}$  NMR (A),  $^{13}\text{C}$  NMR (B), DEPT 135 (C), HMQC (D), HMBC (E) and COSY (F) spectra of Compounds 1 (600 MHz, Pyridine- $d_5$ ).

Fig. S4.  $^1\text{H}$  NMR (A),  $^{13}\text{C}$  NMR (B), DEPT 135 (C), HMQC (D), HMBC (E) and COSY (F) spectra of Compounds 2 (600 MHz, Pyridine- $d_5$ ).

Fig. S5.  $^1\text{H}$  NMR (A),  $^{13}\text{C}$  NMR (B), DEPT 135 (C), HMQC (D), HMBC (E) and COSY (F) spectra of Compounds 3 (600 MHz, Pyridine- $d_5$ ).

#### 2. Supplementary Tables

Table S1.  $^1\text{H}$  NMR Chemical Shifts for Compounds 1-3 (600 MHz, Pyridine- $d_5$ ).

Table S2.  $^{13}\text{C}$  NMR Chemical Shifts for Compounds 1-3 (600 MHz, Pyridine- $d_5$ ).

## 1. Supplementary Figure

A

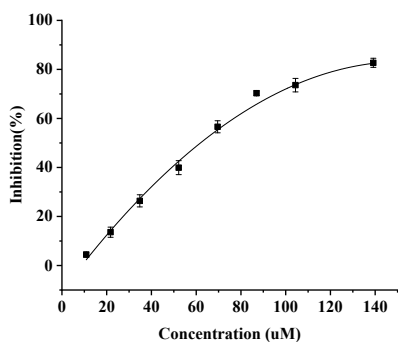

B

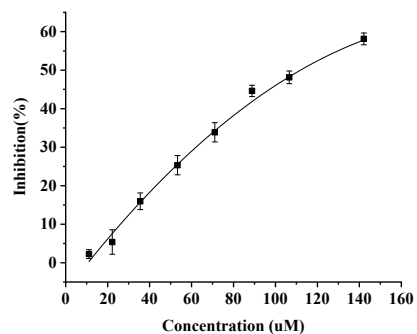

C

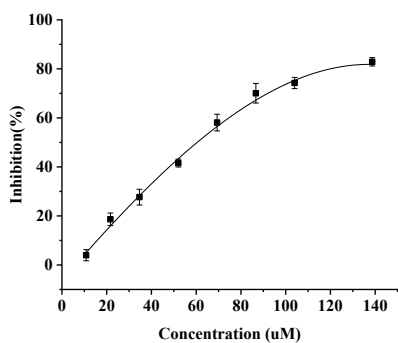

D

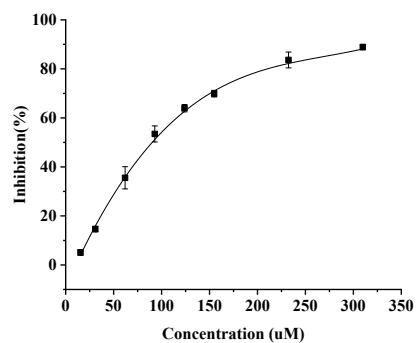

**Fig S1.** Inhibitory effect of stigmasterol glucoside (A), campesterol glucoside (B), daucosterol (C) and acarbose (D) on alpha-amylase.

| Score            | Expect                                                                                    | Method                                                                             | Identities    | Positives     | Gaps       |
|------------------|-------------------------------------------------------------------------------------------|------------------------------------------------------------------------------------|---------------|---------------|------------|
| 1023 bits (2646) | 0.0                                                                                       | Compositional matrix adjust.                                                       | 494/495 (99%) | 494/495 (99%) | 0/495 (0%) |
| NP_999360.1      | <b>MKLFLLLSAFGFCWAQ</b>                                                                   | YAPCTQSGRTSIVHLFEWRWVDIALECERYLGPKGGVQVSPNENIIVVTNPSRPWWERYQPV                     |               |               | 80         |
| pdb 3L2M A       | .....                                                                                     | YAPCTQSGRTSIVHLFEWRWVDIALECERYLGPKGGVQVSPNENIIVVTNPSRPWWERYQPV                     |               |               | 65         |
| Consensus        |                                                                                           | yapqtqsgrtsivhlfewrwwdialecerylgpkggvqvspneniivvtnpsrppwweryqpv                    |               |               |            |
| NP_999360.1      | <b>SYKLCTRSGNENEFRCMVTFCNNVGVRIYVDVINHMCGSGAAAGTGTTCGSYCNFGNREFPAVFYSAWDFNDGKCKTAS</b>    |                                                                                    |               |               | 160        |
| pdb 3L2M A       |                                                                                           | SYKLCTRSGNENEFRCMVTFCNNVGVRIYVDVINHMCGSGAAAGTGTTCGSYCNFGNREFPAVFYSAWDFNDGKCKTAS    |               |               | 145        |
| Consensus        |                                                                                           | syklctrsgnenefrdrvtrcnnvgvriyvdavinhmcgsgaaagtgttcgsychnfgnrefpavfysawdfndgkcktas  |               |               |            |
| NP_999360.1      | <b>GGIESYNDPYQVRDQQLVGLLDLALEKDYVRSMIADYLNKLIIDIGVAGFRIDASKHMWPGDIKAVLDKLNHNLNTNWFPAQ</b> |                                                                                    |               |               | 240        |
| pdb 3L2M A       |                                                                                           | GGIESYNDPYQVRDQQLVGLLDLALEKDYVRSMIADYLNKLIIDIGVAGFRIDASKHMWPGDIKAVLDKLNHNLNTNWFPAQ |               |               | 225        |
| Consensus        |                                                                                           | ggiesyndpyqvrqcqlvglldlalekdyvrsmiadylnkllidigvagfridaskhmrwpgdikavldklhnlntnwfpaq |               |               |            |
| NP_999360.1      | <b>SRPFIHQEVIDIGGEAIGSSEYFGNGRVTEFKYGAKLCTVVRKWSGEEKMSYLNKMWGEWGFMPDRALVFVDNHDNQRGH</b>   |                                                                                    |               |               | 320        |
| pdb 3L2M A       |                                                                                           | SRPFIHQEVIDIGGEAIGSSEYFGNGRVTEFKYGAKLCTVVRKWSGEEKMSYLNKMWGEWGFMPDRALVFVDNHDNQRGH   |               |               | 305        |
| Consensus        |                                                                                           | srpfihqevidlggeaigsseyfnggrvtefkygaklctvvrkwsgeekmsylknwgegwgfmpsdralvfvdnhdnqrgh  |               |               |            |
| NP_999360.1      | <b>GAGGASILTFWDARLYKVAVGFMLAHPYCFTRVMSYRWARNFVNGQEVNDWIGPPNNGV I KEVTINADTTCCNDWVCE</b>   |                                                                                    |               |               | 400        |
| pdb 3L2M A       |                                                                                           | GAGGASILTFWDARLYKVAVGFMLAHPYCFTRVMSYRWARNFVNGQEVNDWIGPPNNGV I KEVTINADTTCCNDWVCE   |               |               | 385        |
| Consensus        |                                                                                           | gaggasiltfwdarlykvavgfmlahpycftrvmsyrwarnfvngqevndwigppnngvikevtinadtccndwvce      |               |               |            |
| NP_999360.1      | <b>HRWRQIRNMVWFRNVVDGQFFANWMDNGSNQVAFGRGNRGFIVFNNDLWQLSSTLQITGLPGGTYCDVISGDKVGNSTGT</b>   |                                                                                    |               |               | 480        |
| pdb 3L2M A       |                                                                                           | HRWRQIRNMVWFRNVVDGQFFANWMDNGSNQVAFGRGNRGFIVFNNDLWQLSSTLQITGLPGGTYCDVISGDKVGNSTGT   |               |               | 465        |
| Consensus        |                                                                                           | hrwrqirnmvwfrnvvdgqffanwmdngsnqvafgrgnrgfivfnndlwqlsstlqitglpggtycdvisgdkvgnstgti  |               |               |            |
| NP_999360.1      | <b>KVYVSSDGTACFSISNSAEDFFIAIHAESK</b>                                                     |                                                                                    |               |               | 510        |
| pdb 3L2M A       |                                                                                           | KVYVSSDGTACFSISNSAEDFFIAIHAESK                                                     |               |               | 495        |
| Consensus        |                                                                                           | kvyvssdgtacfsisnsaedffiaihaesk                                                     |               |               |            |

**Fig S2.** Sequence alignment of the amino acid residue between alpha-amylase (GenBank: NP\_999360.1) and 3L2M\_A from pig pancreatic. ■: Identical sequence (homology=100%); ■: similar sequence (homology≥50%); □: different sequence (homology=0%).



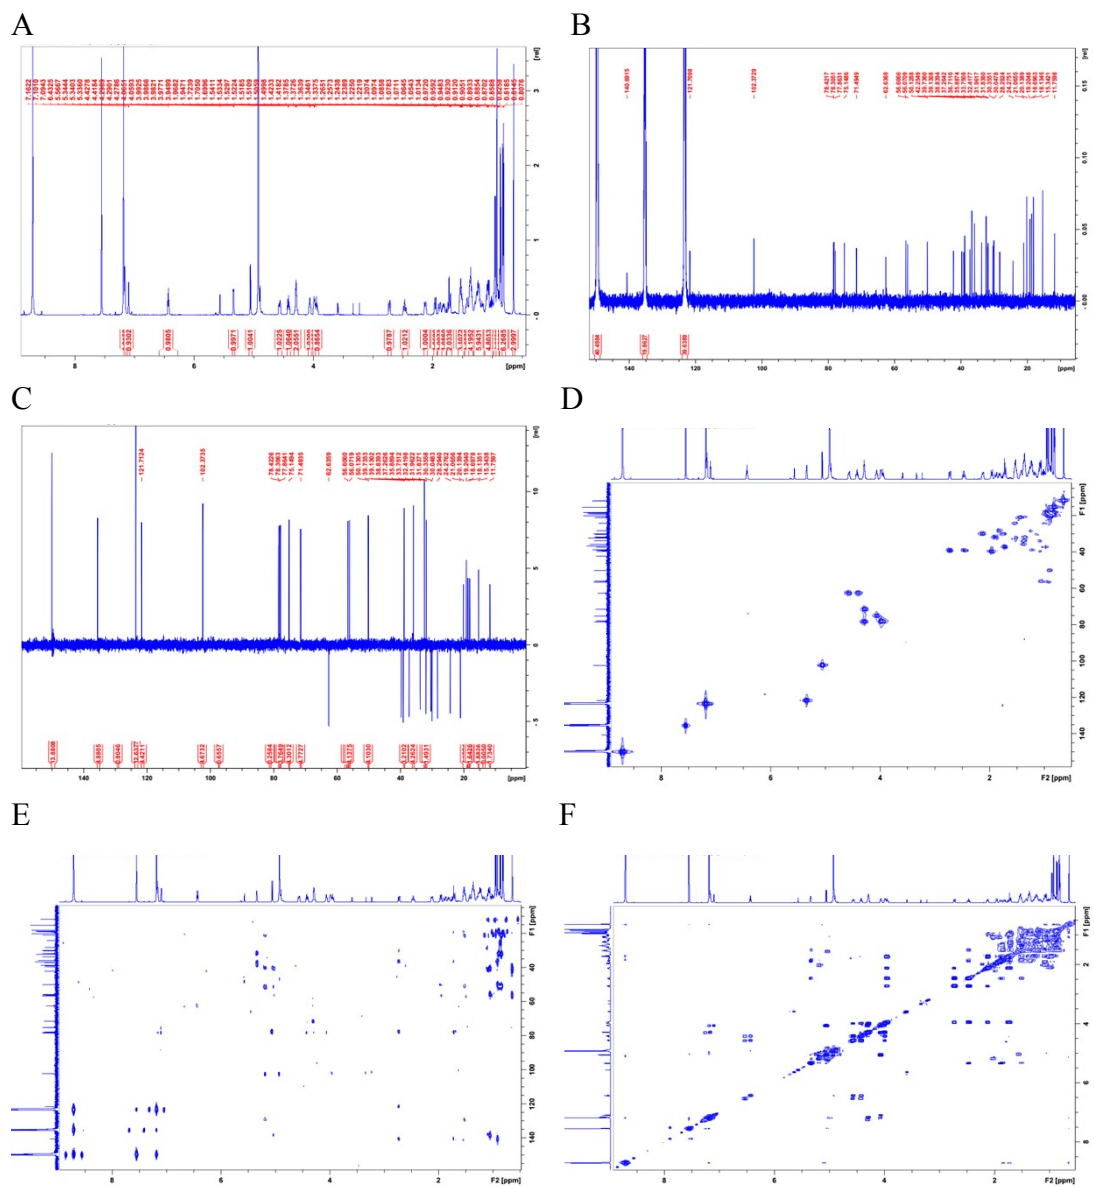

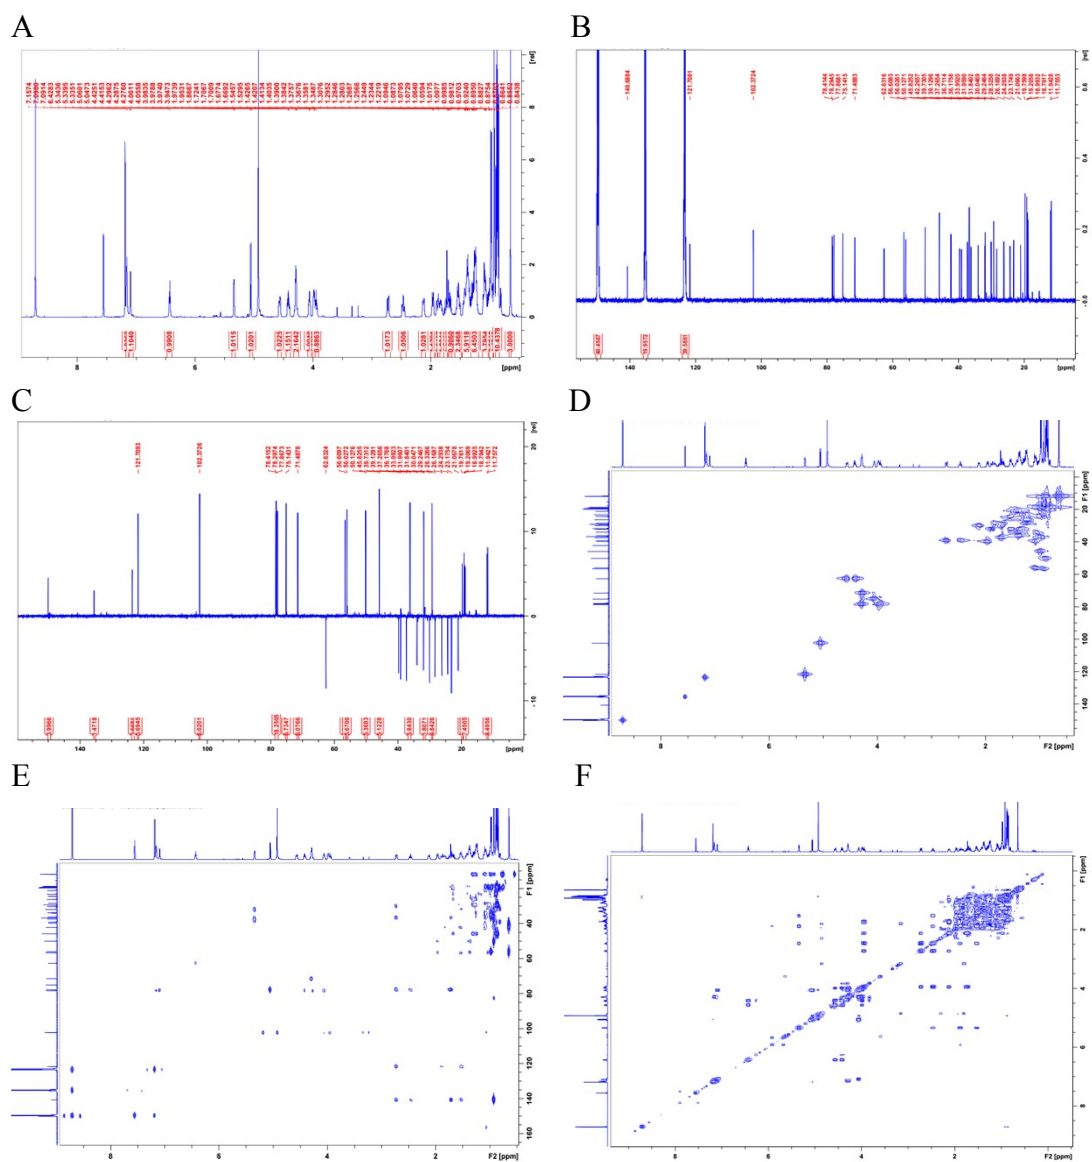

**Fig S5.** <sup>1</sup>H NMR (A), <sup>13</sup>C NMR (B), DEPT 135 (C), HMQC (D), HMBC (E) and COSY (F) spectra of Compounds 3 (600 MHz, Pyridine-*d*<sub>5</sub>)

## 2. Supplementary Tables

**Table S1.** <sup>1</sup>H NMR Chemical Shifts for Compounds 1-3 (600 MHz, Pyridine-*d*<sub>5</sub>)

| Proto<br>n | Compounds ( $\delta$ in ppm) |                            |                            |
|------------|------------------------------|----------------------------|----------------------------|
|            | 1 ( <i>J</i> in Hz)          | 2 ( <i>J</i> in Hz)        | 3 ( <i>J</i> in Hz)        |
| 1a         | 1.70 (m)                     | 1.71 (m)                   | 1.70 (m)                   |
| 1b         | 0.95 (m)                     | 0.97 (m)                   | 0.95 (m)                   |
| 2a         | 2.12 (m)                     | 2.12 (m)                   | 2.11 (m)                   |
| 2b         | 1.73 (overlapped)            | 1.73 (overlapped)          | 1.73 (overlapped)          |
| 3          | 3.96 (m)                     | 3.98 (m)                   | 3.98 (m)                   |
| 4a         | 2.72 (ddd, 13.4, 4.8, 2.3)   | 2.73 (ddd, 13.4, 4.8, 2.3) | 2.72 (ddd, 13.4, 4.8, 2.3) |
| 4b         | 2.47 (m)                     | 2.47 (m)                   | 2.47 (m)                   |
| 6          | 5.34 (dd, 4.8, 2.1)          | 5.34 (dd, 4.8, 2.1)        | 5.34 (dd, 4.8, 2.1)        |
| 7a         | 1.86 (m)                     | 1.87 (m)                   | 1.86 (m)                   |
| 7b         | 1.36 (overlapped)            | 1.36 (overlapped)          | 1.36 (overlapped)          |
| 8          | 1.52 (m)                     | 1.51 (m)                   | 1.52 (m)                   |
| 9          | 0.89 (overlapped)            | 0.89 (m)                   | 0.89 (overlapped)          |
| 11a        | 1.47 (m)                     | 1.44 (m)                   | 1.46 (m)                   |
| 11b        | 1.42 (m)                     | 1.42 (m)                   | 1.42 (m)                   |
| 12a        | 1.91 (dd, 12.5, 3.5)         | 1.96 (dd, 12.7, 3.3)       | 1.96 (dd, 12.5, 3.5)       |
| 12b        | 1.08 (overlapped)            | 1.09 (overlapped)          | 1.09 (overlapped)          |
| 14         | 1.09 (overlapped)            | 1.07 (overlapped)          | 1.08 (overlapped)          |
| 15a        | 1.48 (m)                     | 1.54 (m)                   | 1.54 (m)                   |
| 15b        | 0.92 (overlapped)            | 1.00 (overlapped)          | 1.00 (overlapped)          |
| 16a        | 1.73 (overlapped)            | 1.84 (m)                   | 1.83 (m)                   |
| 16b        | 1.24 (m)                     | 1.25 (m)                   | 1.26 (overlapped)          |
| 17         | 0.94 (overlapped)            | 0.93 (overlapped)          | 0.93 (overlapped)          |
| 18         | 0.65 (s)                     | 0.65 (s)                   | 0.65 (s)                   |
| 19         | 0.92 (s)                     | 0.92 (s)                   | 0.92 (s)                   |
| 20         | 2.02 (m)                     | 1.38 (overlapped)          | 1.37 (overlapped)          |
| 21         | 0.84 (d, 6.6)                | 0.95 (d, 6.5)              | 0.97 (d, 6.5)              |
| 22a        | 5.19 (dd, 15.2, 8.8)         | 1.38 (overlapped)          | 1.38 (overlapped)          |
| 22b        | -                            | 1.08 (overlapped)          | 1.04 (overlapped)          |
| 23a        | 5.06 (overlapped)            | 1.16 (overlapped)          | 1.25 (overlapped)          |
| 23b        | -                            | 1.15 (overlapped)          | 1.24 (overlapped)          |
| 24         | 1.56 (m)                     | 1.22 (m)                   | 0.99 (overlapped)          |
| 25         | 1.53 (m)                     | 1.90 (m)                   | 1.68 (m)                   |
| 26         | 0.89 (d, 6.6)                | 0.82 (d, 6.8)              | 0.85 (d, 6.8)              |
| 27         | 1.05 (d, 6.6)                | 0.87 (d, 6.8)              | 0.87 (d, 6.8)              |
| 28a        | 1.42 (m)                     | 0.81 (d, 6.5)              | 1.31 (m)                   |
| 28b        | 1.20 (m)                     | -                          | 1.27 (m)                   |
| 29         | 0.86 (t, 7.4)                | -                          | 0.88 (t, 7.4)              |
| Glc        |                              |                            |                            |
| 1'         | 5.07 (overlapped)            | 5.06 (d, 7.7)              | 5.05 (d, 7.7)              |
| 2'         | 4.07 (dd, 8.1, 3.5)          | 4.06 (dd, 8.5, 3.8)        | 4.06 (dd, 8.0, 3.6)        |
| 3'         | 4.30 (overlapped)            | 4.29 (overlapped)          | 4.29 (overlapped)          |
| 4'         | 4.29 (overlapped)            | 4.28 (overlapped)          | 4.28 (overlapped)          |
| 5'         | 3.95 (m)                     | 3.95 (m)                   | 3.94 (m)                   |
| 6'a        | 4.58 (ddd, 11.8, 5.7, 2.5)   | 4.56 (ddd, 11.8, 5.6, 2.5) | 4.56 (ddd, 11.8, 5.6, 2.5) |
| 6'b        | 4.43 (m)                     | 4.42 (m)                   | 4.42 (m)                   |

**Not:** *J* values are given in parentheses. Overlapped signals are detected on HMQC experiment. Multiplicities: s = singlet, d = doublet, t = triplet, m = multiplet.

**Table S2.**  $^{13}\text{C}$  NMR Chemical Shifts for Compounds 1-3 (600 MHz, Pyridine- $d_5$ )

| Carbon | Compounds ( $\delta$ in ppm) |                         |                         |
|--------|------------------------------|-------------------------|-------------------------|
|        | 1                            | 2                       | 3                       |
| 1      | 37.3 (CH <sub>2</sub> )      | 37.3 (CH <sub>2</sub> ) | 37.3 (CH <sub>2</sub> ) |
| 2      | 30.0 (CH <sub>2</sub> )      | 30.0 (CH <sub>2</sub> ) | 30.0 (CH <sub>2</sub> ) |
| 3      | 78.3 (CH)                    | 78.3 (CH)               | 78.3 (CH)               |
| 4      | 39.1 (CH <sub>2</sub> )      | 39.1 (CH <sub>2</sub> ) | 39.1 (CH <sub>2</sub> ) |
| 5      | 140.7 (C)                    | 140.7 (C)               | 140.7 (C)               |
| 6      | 121.7 (CH)                   | 121.7 (CH)              | 121.7 (CH)              |
| 7      | 31.9 (CH <sub>2</sub> )      | 32.0 (CH <sub>2</sub> ) | 31.9 (CH <sub>2</sub> ) |
| 8      | 31.8 (CH)                    | 31.8 (CH)               | 31.8 (CH)               |
| 9      | 50.1 (CH)                    | 50.1 (CH)               | 50.1 (CH)               |
| 10     | 36.7 (C)                     | 36.7 (C)                | 36.7 (C)                |
| 11     | 21.0 (CH <sub>2</sub> )      | 21.1 (CH <sub>2</sub> ) | 21.0 (CH <sub>2</sub> ) |
| 12     | 39.6 (CH <sub>2</sub> )      | 39.7 (CH <sub>2</sub> ) | 39.7 (CH <sub>2</sub> ) |
| 13     | 42.1 (C)                     | 42.3 (C)                | 42.3 (C)                |
| 14     | 56.7 (CH)                    | 56.6 (CH)               | 56.6 (CH)               |
| 15     | 24.3 (CH <sub>2</sub> )      | 24.2 (CH <sub>2</sub> ) | 24.2 (CH <sub>2</sub> ) |
| 16     | 29.1 (CH <sub>2</sub> )      | 28.3 (CH <sub>2</sub> ) | 28.3 (CH <sub>2</sub> ) |
| 17     | 55.8 (CH)                    | 56.1 (CH)               | 56.0 (CH)               |
| 18     | 11.9 (CH <sub>3</sub> )      | 11.8 (CH <sub>3</sub> ) | 11.7 (CH <sub>3</sub> ) |
| 19     | 19.2 (CH <sub>3</sub> )      | 19.2 (CH <sub>3</sub> ) | 19.2 (CH <sub>3</sub> ) |
| 20     | 40.6 (CH)                    | 35.9 (CH)               | 36.1 (CH)               |
| 21     | 19.0 (CH <sub>3</sub> )      | 18.7 (CH <sub>3</sub> ) | 18.9 (CH <sub>3</sub> ) |
| 22     | 138.6 (CH)                   | 33.8 (CH <sub>2</sub> ) | 33.9 (CH <sub>2</sub> ) |
| 23     | 129.2 (CH)                   | 30.4 (CH <sub>2</sub> ) | 26.1 (CH <sub>2</sub> ) |
| 24     | 51.2 (CH)                    | 38.8 (CH)               | 45.3 (CH)               |
| 25     | 32.0 (CH)                    | 32.4 (CH)               | 29.2 (CH)               |
| 26     | 21.1 (CH <sub>3</sub> )      | 18.1 (CH <sub>3</sub> ) | 18.7 (CH <sub>3</sub> ) |
| 27     | 21.3 (CH <sub>3</sub> )      | 20.1 (CH <sub>3</sub> ) | 19.7 (CH <sub>3</sub> ) |
| 28     | 25.5 (CH <sub>2</sub> )      | 15.3 (CH <sub>3</sub> ) | 23.1 (CH <sub>2</sub> ) |
| 29     | 12.3 (CH <sub>3</sub> )      | -                       | 11.9 (CH <sub>3</sub> ) |
| Glc    |                              |                         |                         |
| 1'     | 102.3 (CH)                   | 102.4 (CH)              | 102.4 (CH)              |
| 2'     | 75.1 (CH)                    | 75.1 (CH)               | 75.1 (CH)               |
| 3'     | 78.4 (CH)                    | 78.4 (CH)               | 78.4 (CH)               |
| 4'     | 71.5 (CH)                    | 71.5 (CH)               | 71.5 (CH)               |
| 5'     | 77.8 (CH)                    | 77.9 (CH)               | 77.9 (CH)               |
| 6'     | 62.6 (CH <sub>2</sub> )      | 62.6 (CH <sub>2</sub> ) | 62.6 (CH <sub>2</sub> ) |

**Not:** Multiplicities are decided on DEPT experiments
